P5325

## A possible paradoxical association between LDL-cholesterol in myocardial infarction patients and relation to major adverse outcomes - a 10-year nationwide cohort study

J. Schubert<sup>1</sup>, B. Lindahl<sup>1</sup>, H. Melhus<sup>1</sup>, H. Renlund<sup>2</sup>, M. Leosdottir<sup>3</sup>, A. Allahyari<sup>4</sup>, P. Ueda<sup>5</sup>, T. Jernberg<sup>4</sup>, E. Hagstrom<sup>1</sup>

<sup>1</sup>Uppsala University, Department of Medical Sciences, Uppsala, Sweden; <sup>2</sup>Uppsala Clinical Research Center, Uppsala, Sweden; <sup>3</sup>Skane University Hospital, Department of Cardiology, Lund, Sweden; <sup>4</sup>Danderyd University Hospital, Department of Clinical Sciences, Stockholm, Sweden; <sup>5</sup>Karolinska Institute, Clinical Epidemiology Division, Department of Medicine, Stockholm, Sweden

**Background:** Cardiovascular disease (CVD) risk increases with the level of LDL-cholesterol (LDL-C), and LDL-C lowering treatment improves prognosis. Less is known about LDL-C levels at myocardial infarction (MI) admission and long-term prognosis.

**Purpose:** To investigate admission LDL-C levels in relation to mortality, recurrent MI and baseline characteristics.

**Methods:** Patients admitted with an MI in Sweden and recorded in the MI-registry (SWEDEHEART) 2006–2016 were included and followed until 2018. Associations between baseline LDL-C, mortality and MI were assessed with Cox regression analysis, adjusting for risk factors (eg. age, diabetes, prior CV events) and lipid lowering therapy.

**Results:** Of 126,669 patients (median age: 70) admitted with MI, 26.2% (n=32,883) had ongoing statin therapy, and the median LDL-C was 2.96 (interquartile range 2.23, 3.74) mmol/L. During median follow-up of 4.2 years, 31,024 died and 17,896 had an MI (table). Patients with higher LDL-C were younger, had substantially fewer comorbidities such as diabetes

and prior CVD ( $p < 0.001$ ). In this analysis there was an interaction with ongoing statin-use ( $p = 0.0025$ ). When dividing patients by LDL-C into quartiles, statin naive in the highest LDL-C quartile (3.95 mmol/L) had a lower risk of death compared to patients in the lowest quartile (2.62 mmol/L) HR 0.86 (95% CI 0.83–0.90). For patients with ongoing statin, the risk was also lower with higher LDL-C (2.84 mmol/L) compared to lower LDL-C (1.72 mmol/L) HR 0.88 (95% CI 0.81–0.96). No association was observed between LDL-C and recurrent MI.

**Conclusions:** In this real-world population with over 126,000 patients and 10 years of follow-up, higher LDL-C at the time of the MI was associated with a markedly better prognosis in patients with and without prior statin therapy. This paradox may, despite adjustment, be caused by a substantially lower CVD baseline risk in patients with higher LDL-C pertaining to a lower burden of risk factors, younger age, and fewer prior CVD events as well as a highly treatable risk factor.

Table 1. Event rate for mortality and myocardial infarction (MI) by LDL quartile groups

|                |              | Q1           | Q2           | Q3           | Q4           |
|----------------|--------------|--------------|--------------|--------------|--------------|
| LDL-C (mmol/L) | Statin naive | <2.62        | 2.62–3.26    | 3.26–3.95    | >3.95        |
|                | Ongoing      | <1.72        | 1.72–2.21    | 2.21–2.84    | >2.84        |
| Mortality      | Statin naive | 0.074 (6553) | 0.049 (4596) | 0.037 (3706) | 0.030 (2949) |
|                | Ongoing      | 0.10 (3297)  | 0.075 (2769) | 0.062 (2462) | 0.055 (2157) |
| MI             | Statin naive | 0.034 (2808) | 0.026 (2292) | 0.024 (2269) | 0.023 (2094) |
|                | Ongoing      | 0.064 (1796) | 0.055 (1792) | 0.048 (1694) | 0.044 (1557) |

Event/year (n of events) stratified by statin treatment at index event.
